# Supplementary material
Source: ML conference proceedings conference paper supplement (https://openreview.net/forum?id=kuFGLDlyIb)

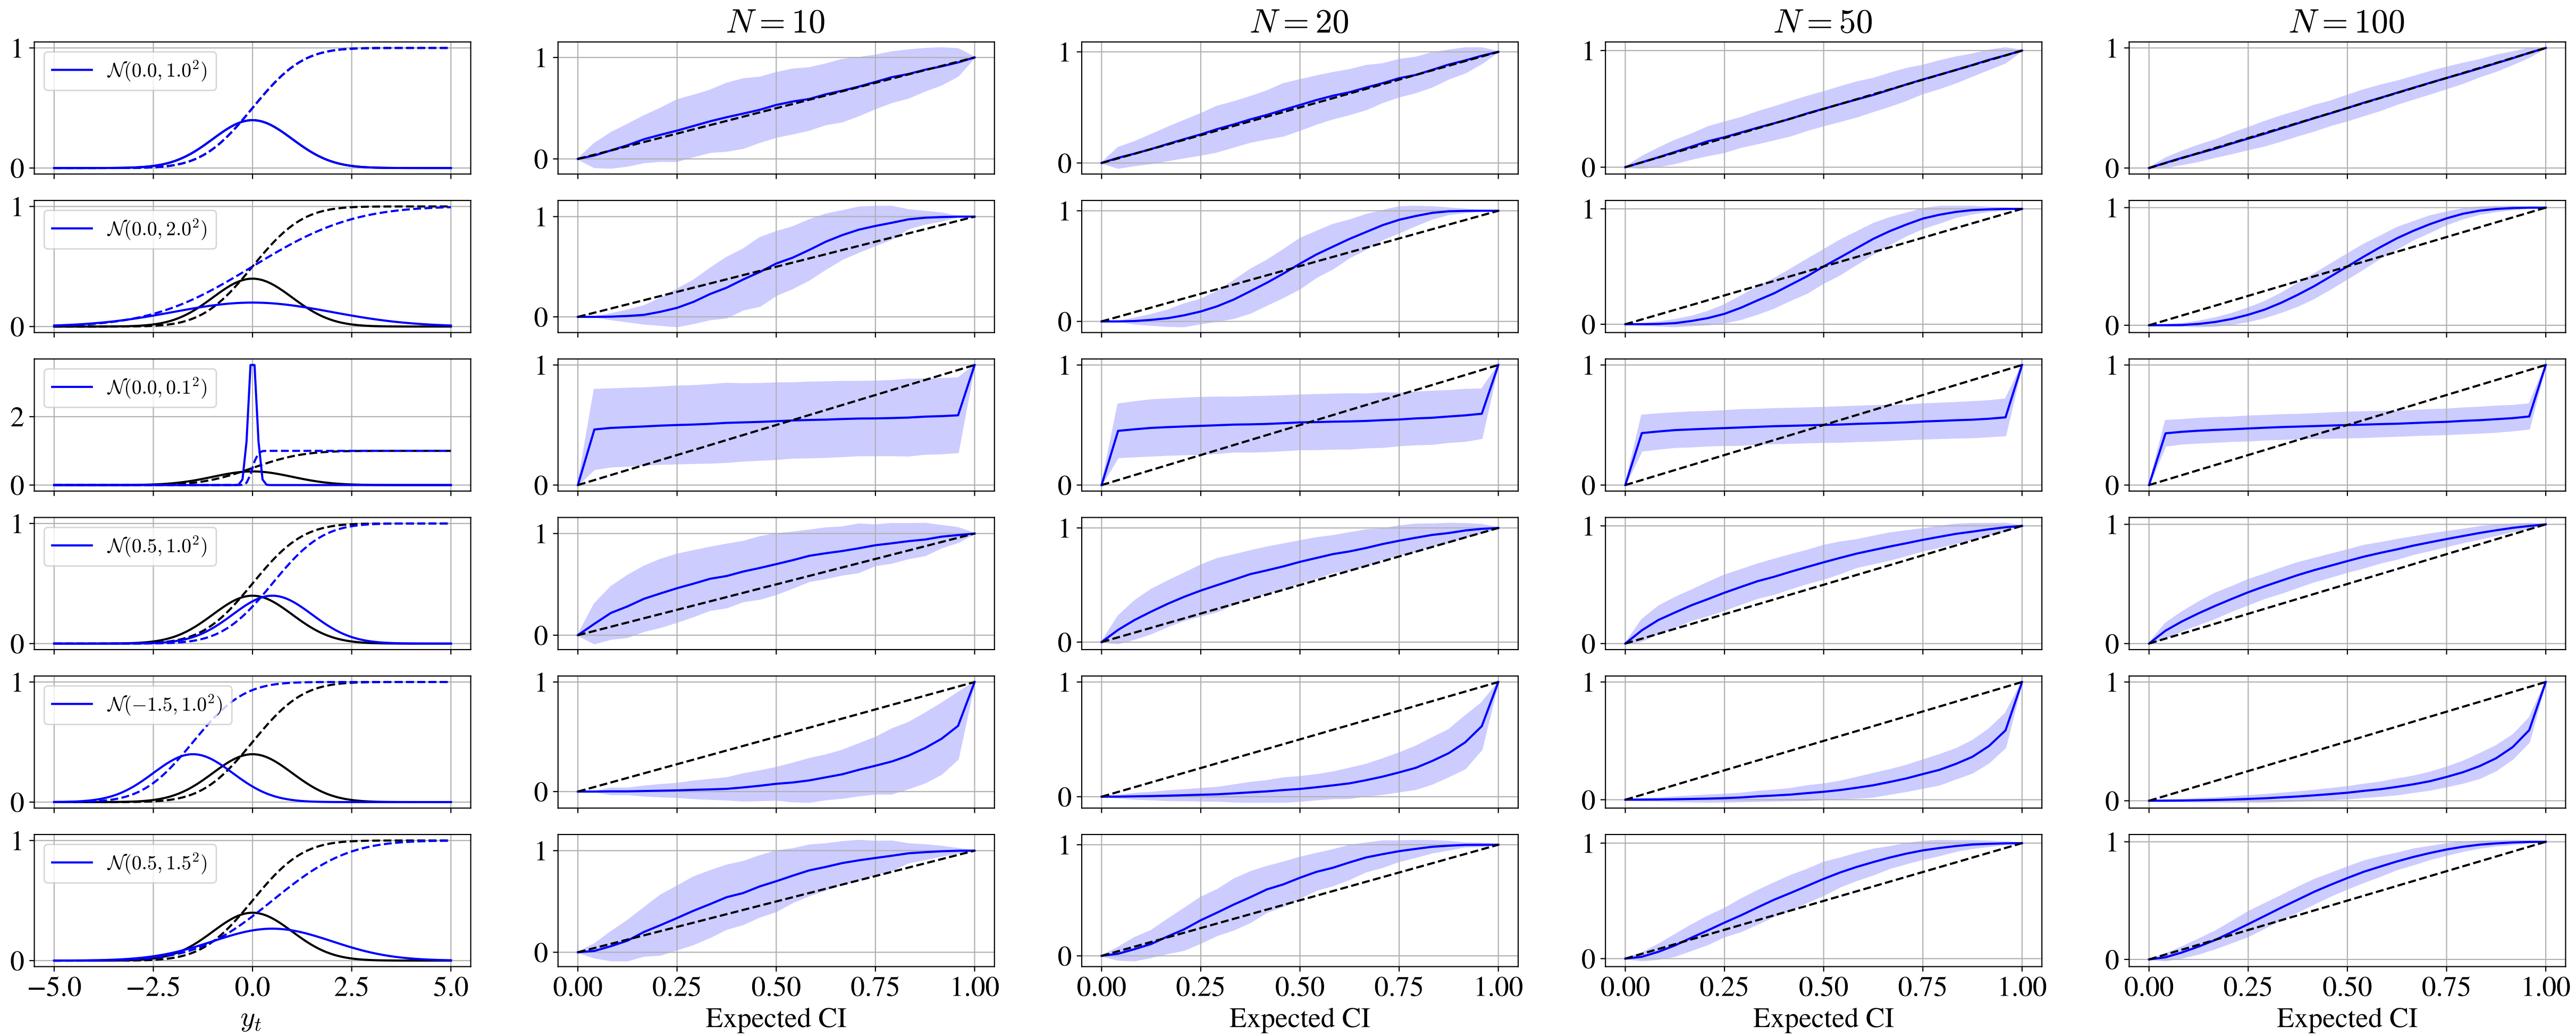

Supplement: supplementary_material [file attachment]

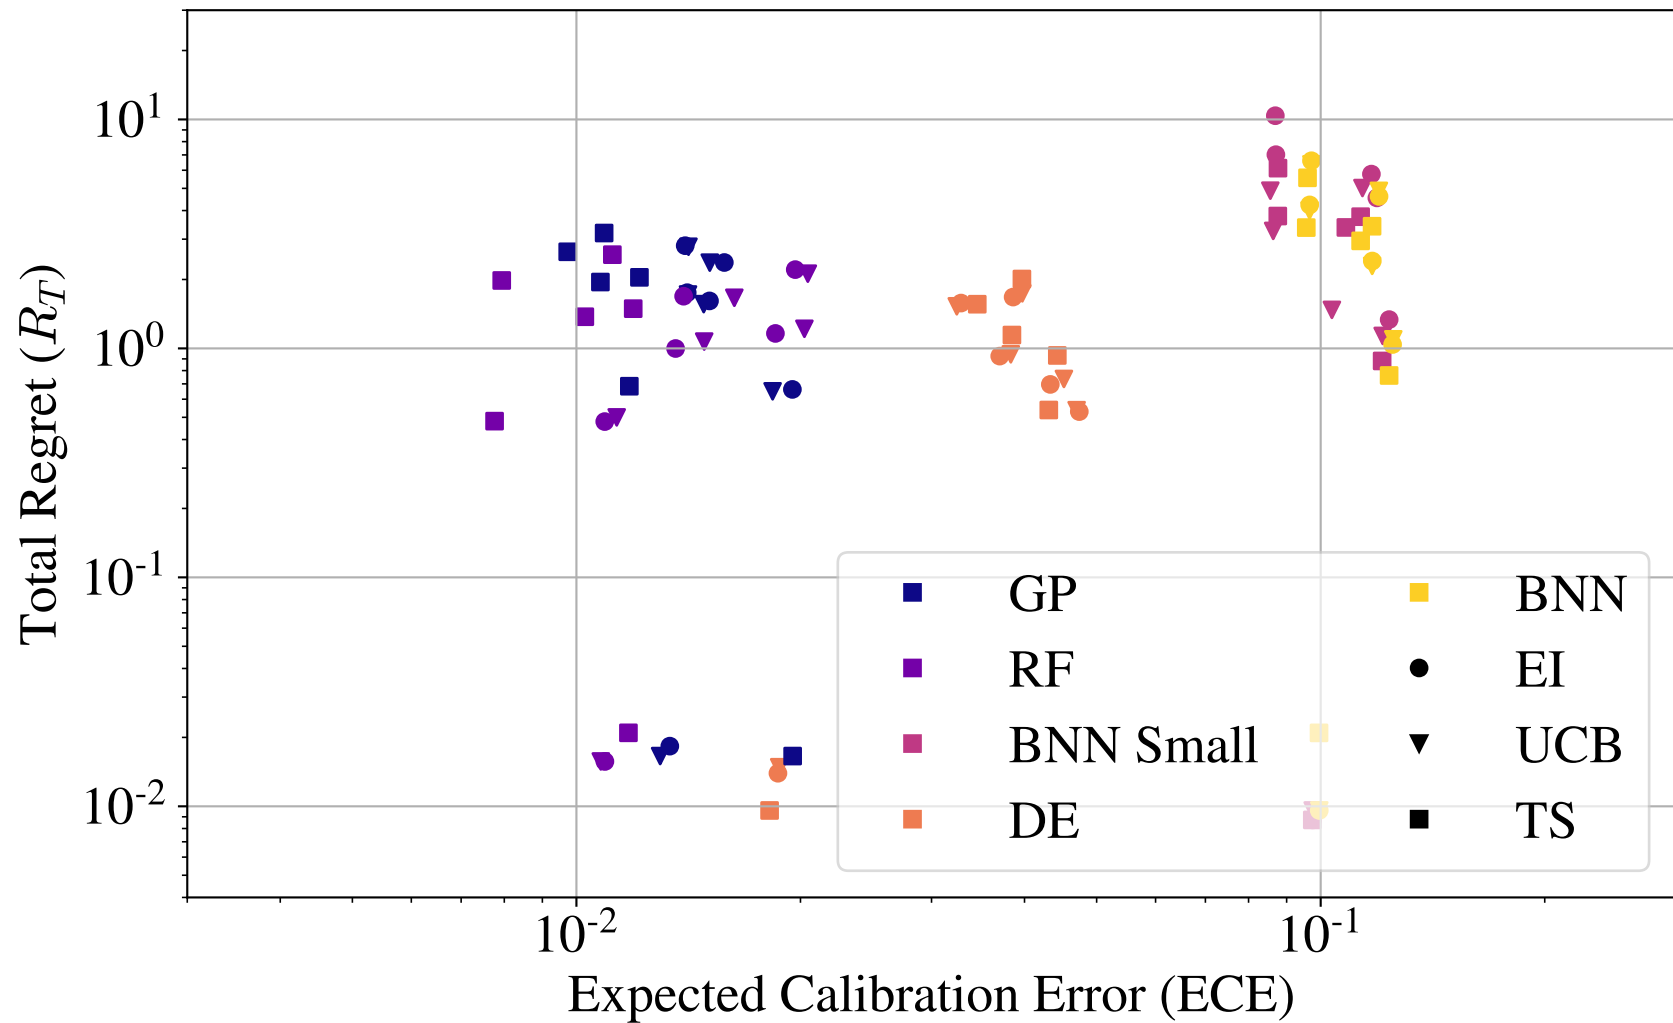

Supplement: supplementary_material [file attachment]

Expected Calibration Error (ECE)

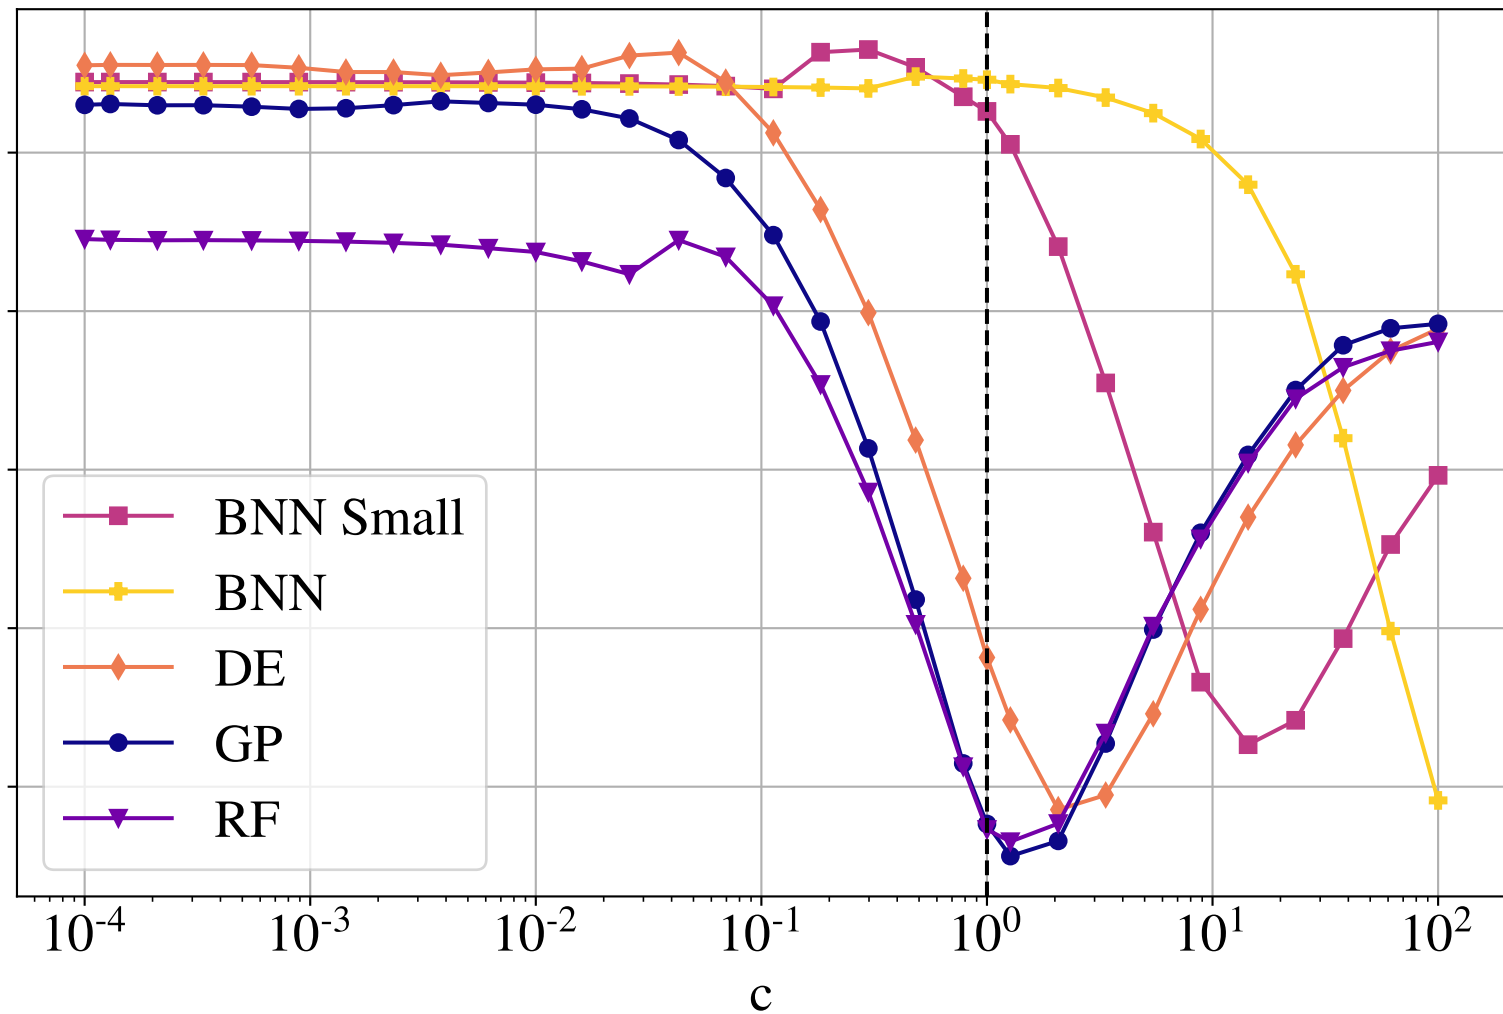

Supplement: supplementary_material [file attachment]

Total Regret ( $R_T$ )

$10^0$

$10^{-4}$

$10^{-3}$

$10^{-2}$

$10^{-1}$

$10^0$

$10^1$

$10^2$

$c$

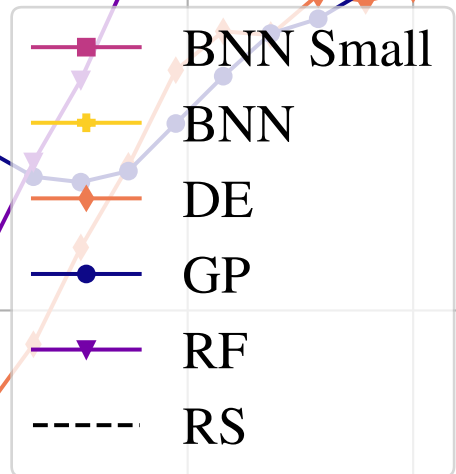

Supplement: supplementary_material [file attachment]

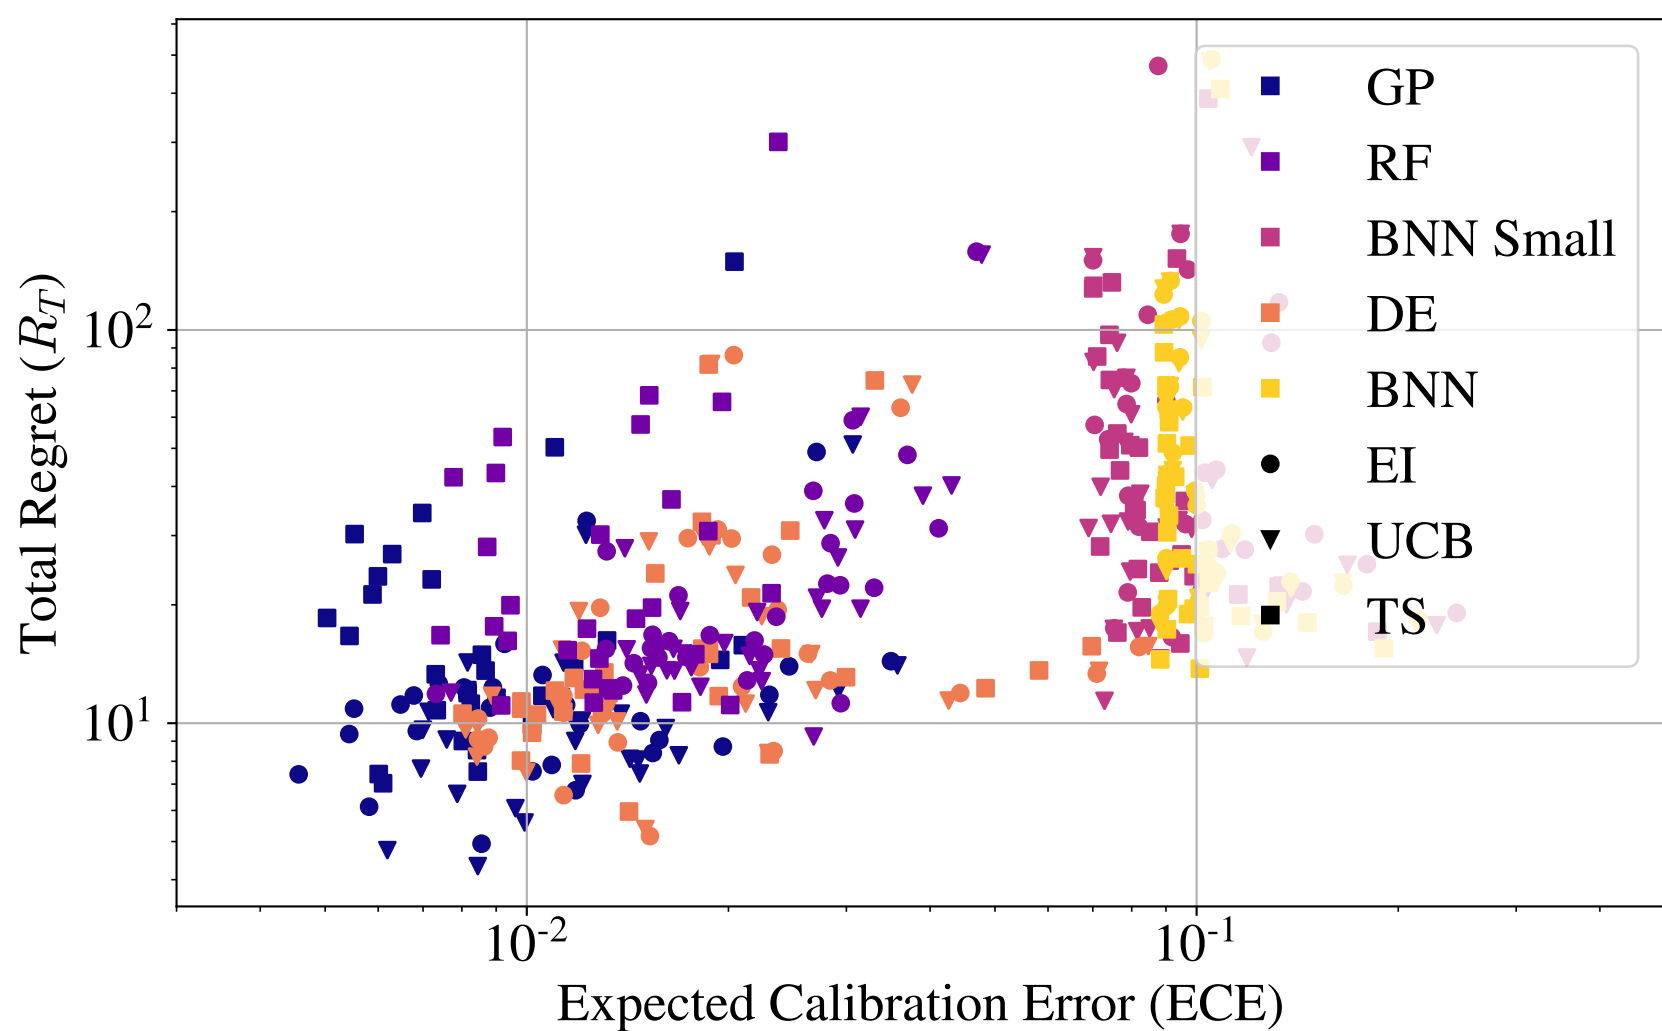

Supplement: supplementary_material [file attachment]

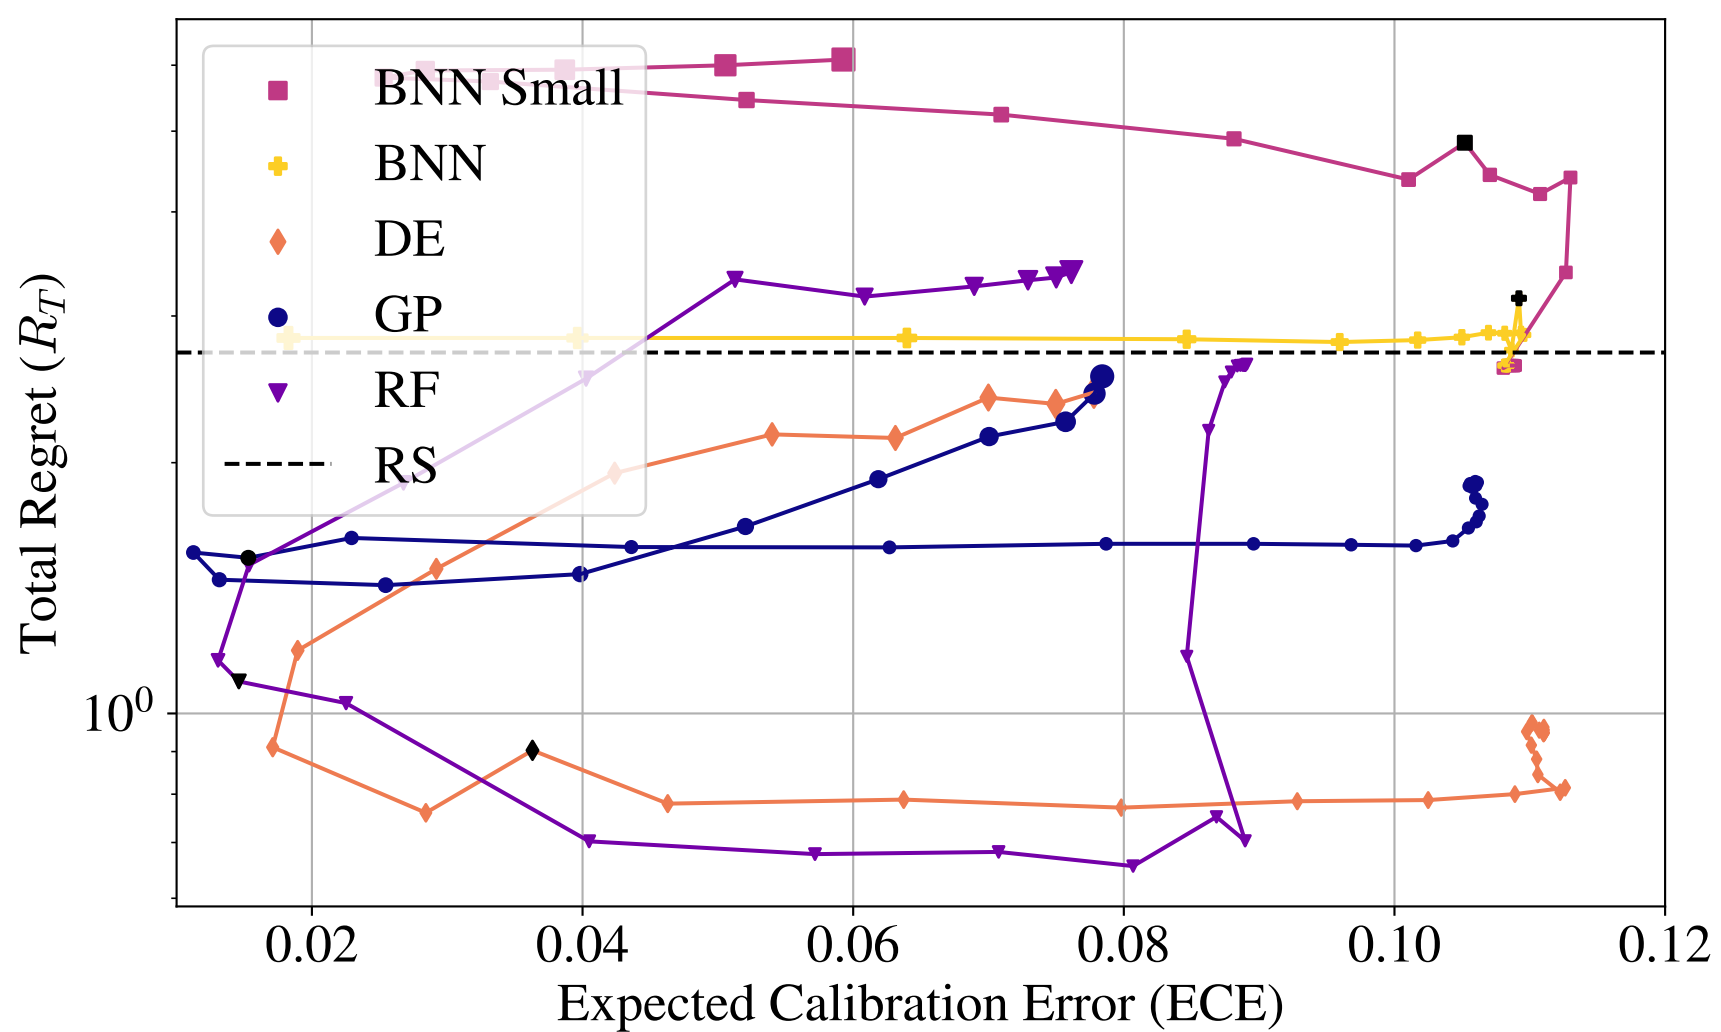

Supplement: supplementary_material [file attachment]

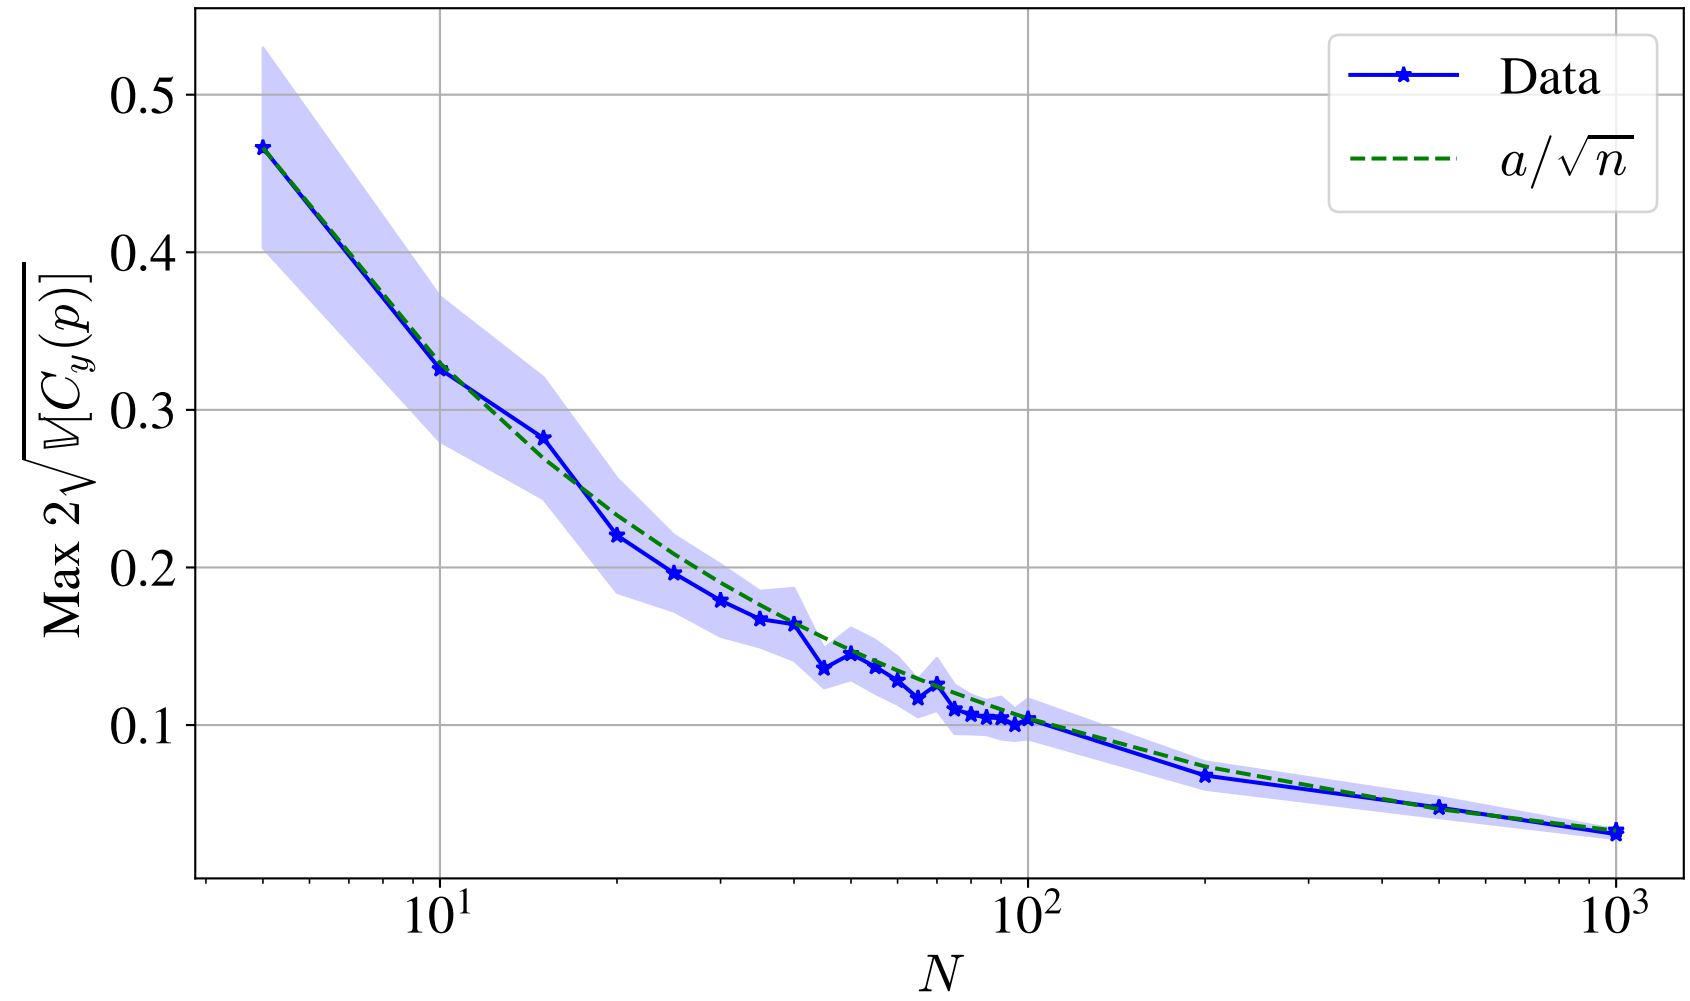

Supplement: supplementary_material [file attachment]
